# Supplementary material for: Effects of Central Metal Ion on Binuclear Metal Phthalocyanine-Based Redox Mediator for Lithium Carbonate Decomposition
Source: MDPI journal article supplement (doi:10.3390/molecules29092034), 2024-04-28
Supplement: s1 [file s1]

## Supplementary Materials

# Effects of Central Metal Ion on Binuclear Metal Phthalocyanine-Based Redox Mediator for Lithium Carbonate Decomposition

Qinghui Yan <sup>1,4,†</sup>, Linghui Yan <sup>3,†</sup>, Haoshen Huang <sup>2</sup>, Zhengfei Chen <sup>2</sup>, Zixuan Liu <sup>2,4,\*</sup>, Shaodong Zhou <sup>3,\*</sup> and Haiyong He <sup>4</sup>

<sup>1</sup> School of Materials Science and Chemical Engineering, Ningbo University, Ningbo 315211, China; 2111086218@nbu.edu.cn

<sup>2</sup> School of Biological and Chemical Engineering, NingboTech University, Ningbo 315100, China; 13685729957@163.com (H.H.); zhengfei.chen@nbt.edu.cn (Z.C.)

<sup>3</sup> College of Chemical and Biological Engineering, Zhejiang University, Hangzhou 310058, China; lhyan@zju.edu.cn

<sup>4</sup> Ningbo Institute of Materials Technology and Engineering, Chinese Academy of Sciences, Ningbo 315201, China; hehaiyong@nimte.ac.cn

\* Correspondence: liuzixuan@nbt.edu.cn (Z.L.); szhou@zju.edu.cn (S.Z.); Tel.: +86-574-882-295-98 (Z.L.); +86-571-879-516-15 (S.Z.)

† These authors contributed equally to this work.

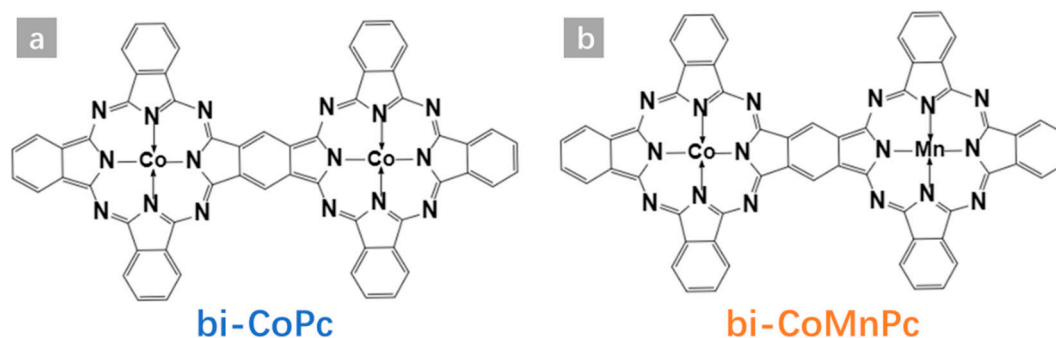

**Figure S1.** The structures of bi-CoPc and bi-CoMnPc

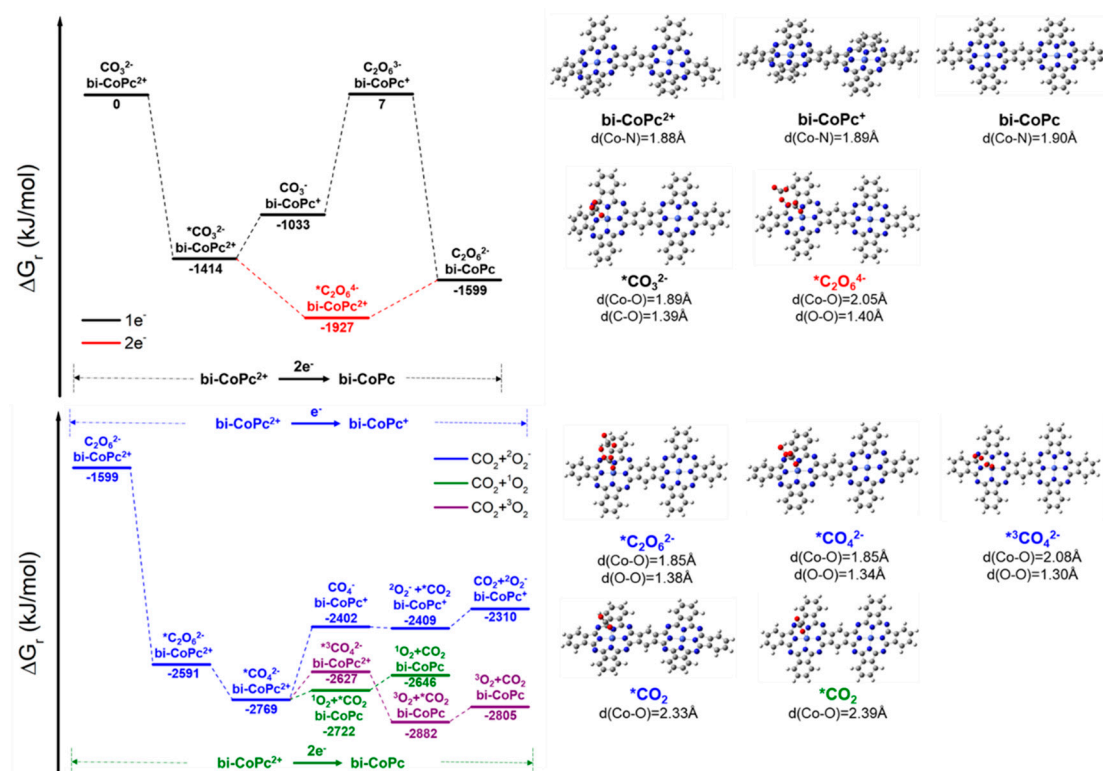

**Figure S2.** The  $\text{Li}_2\text{CO}_3$  decomposition pathways on  $\text{bi-CoPc}^{2+}$  and corresponding structures with  $\text{bi-CoPc}^{2+} \rightarrow \text{bi-CoPc}$

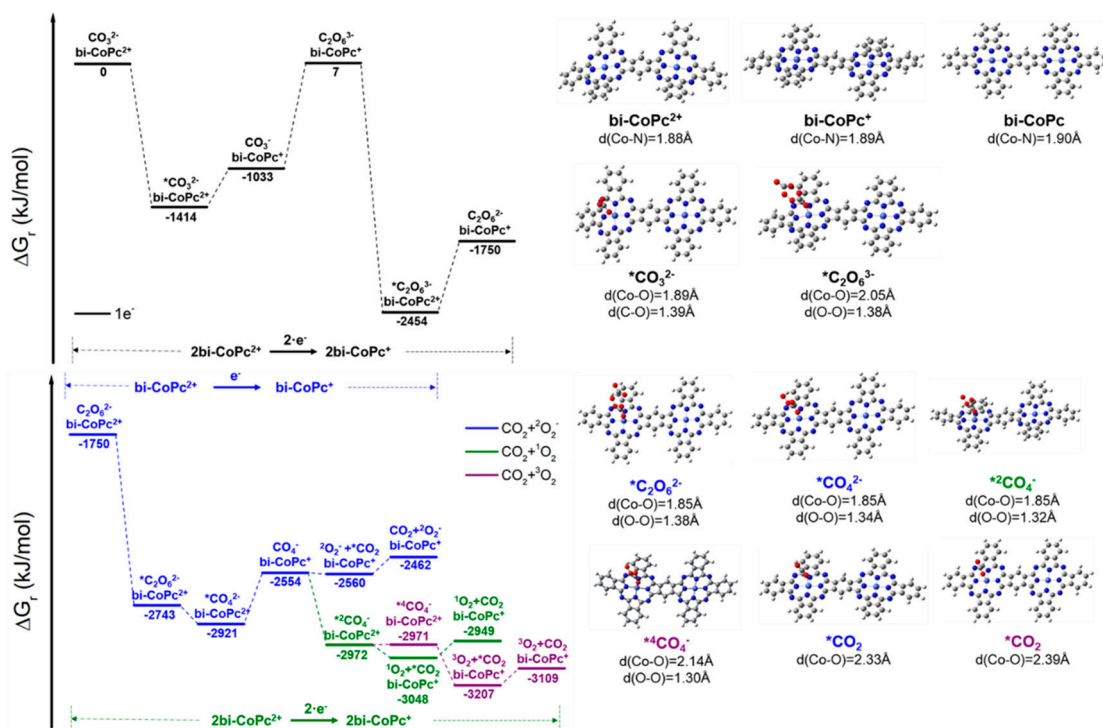

**Figure S3.** The  $\text{Li}_2\text{CO}_3$  decomposition pathways on pristine  $\text{bi-CoPc}^{2+}$  and the corresponding structures with  $2\text{bi-CoPc}^{2+} \rightarrow 2\text{bi-CoPc}^+$

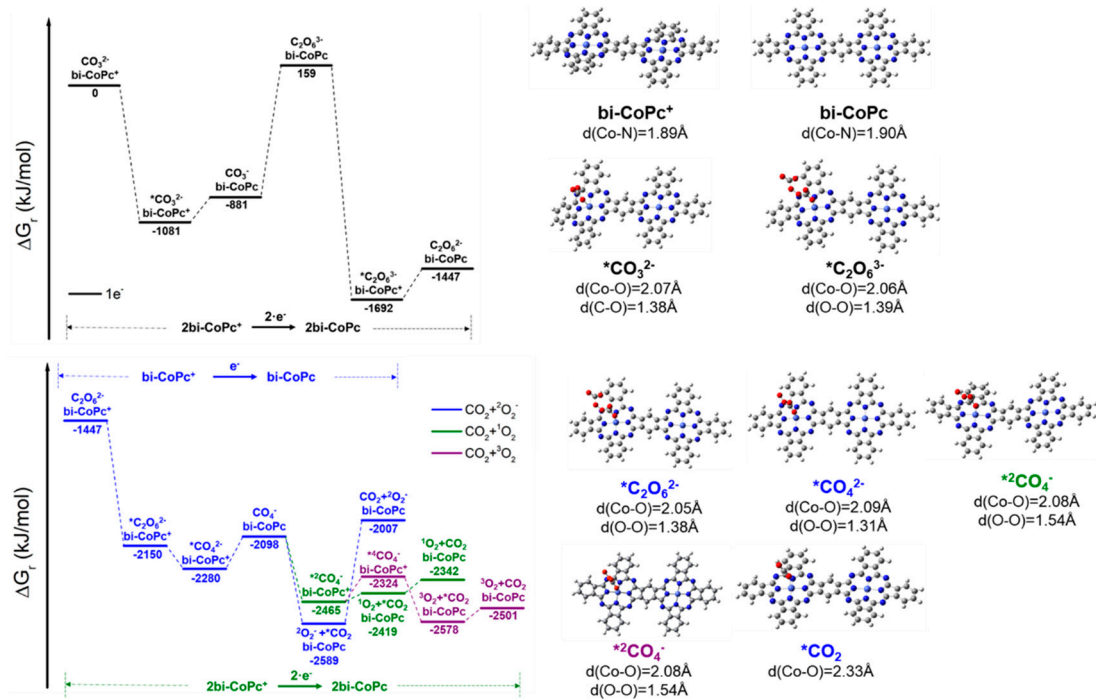

**Figure S4.** The  $\text{Li}_2\text{CO}_3$  decomposition pathways on  $\text{bi-CoPc}^+$  and the corresponding structures with  $2\text{bi-CoPc}^+ \rightarrow 2\text{bi-CoPc}$

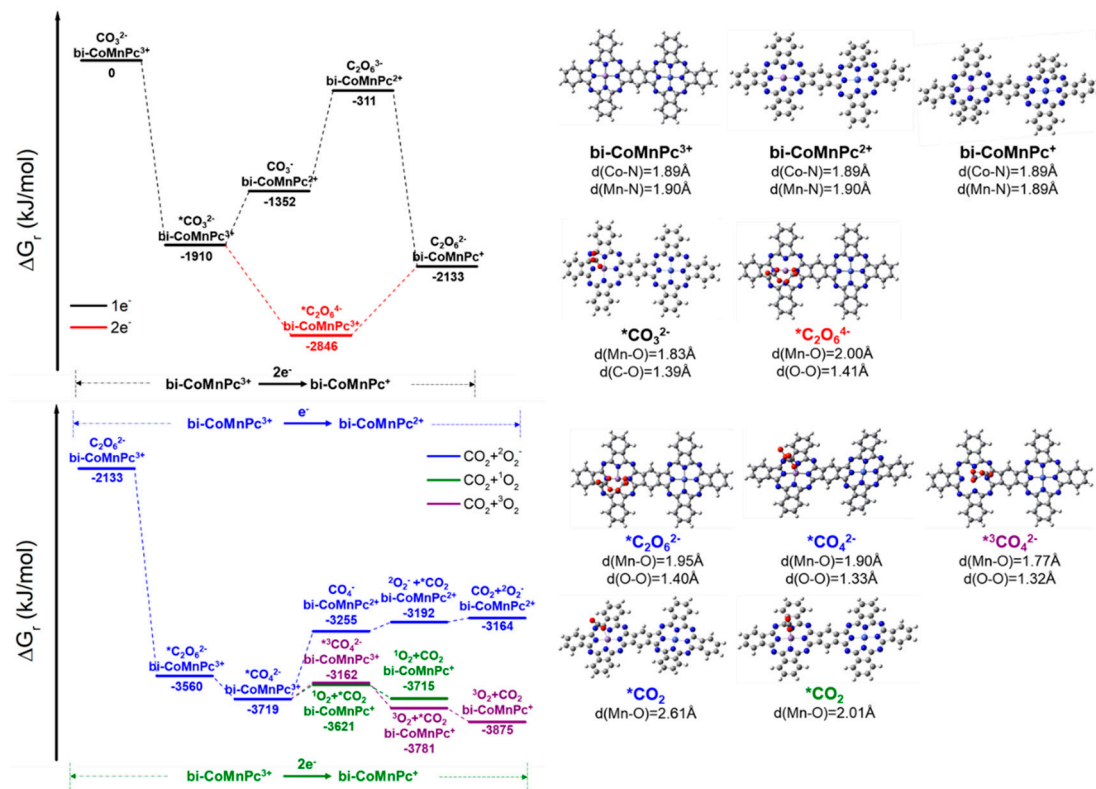

**Figure S5.** The  $\text{Li}_2\text{CO}_3$  decomposition pathways on pristine  $\text{bi-CoMnPc}^{3+}$  and the corresponding structures with  $\text{bi-CoMnPc}^{3+} \rightarrow \text{bi-CoMnPc}^+$

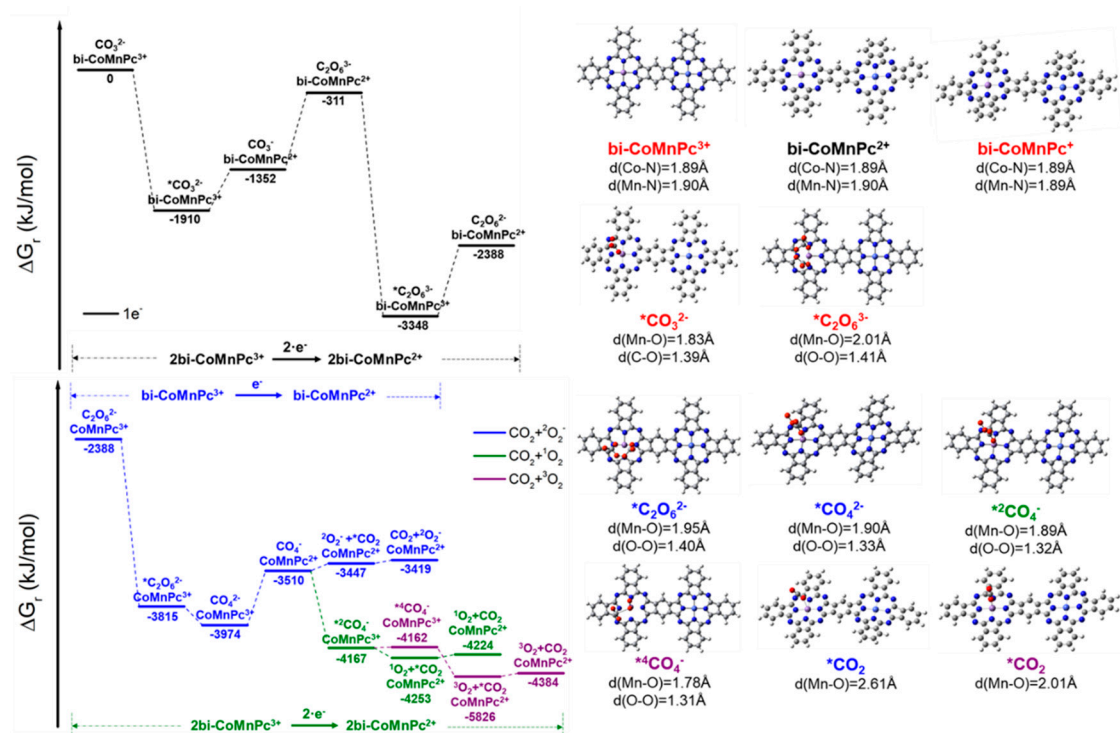

**Figure S6.** The  $\text{Li}_2\text{CO}_3$  decomposition pathways on pristine  $\text{bi-CoMnPc}^{3+}$  and the corresponding structures with  $2\text{bi-CoMnPc}^{3+} \rightarrow 2\text{bi-CoMnPc}^{2+}$

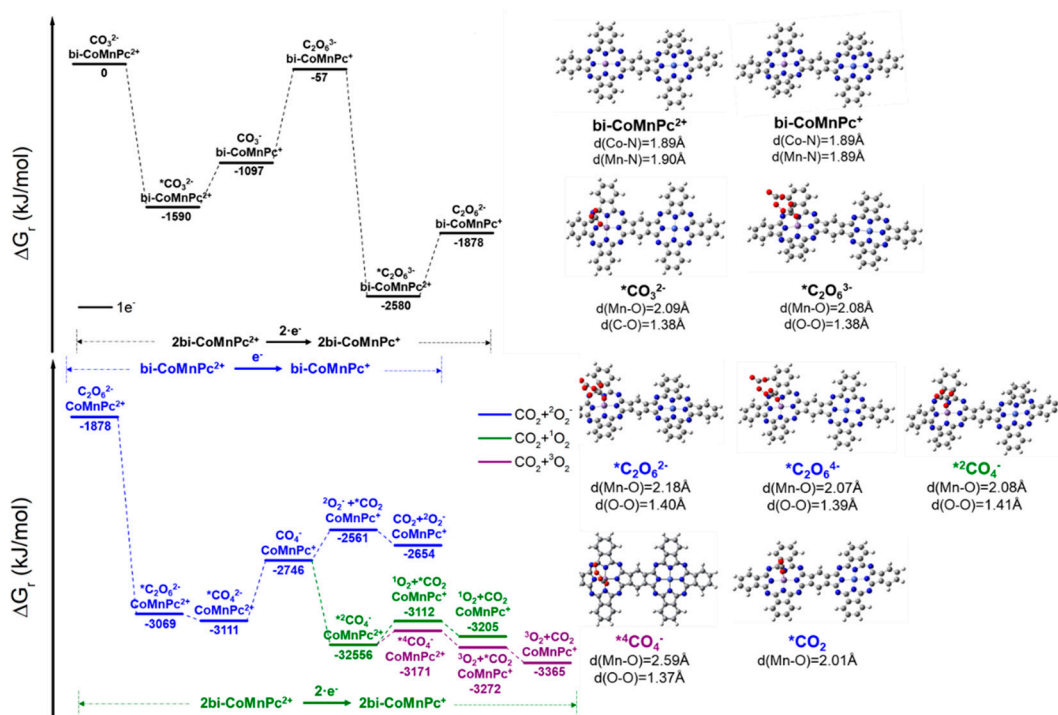

**Figure S7.** The  $\text{Li}_2\text{CO}_3$  decomposition pathways on pristine  $\text{bi-CoMnPc}^{2+}$  and the corresponding structures with  $2\text{bi-CoMnPc}^{2+} \rightarrow 2\text{bi-CoMnPc}^+$

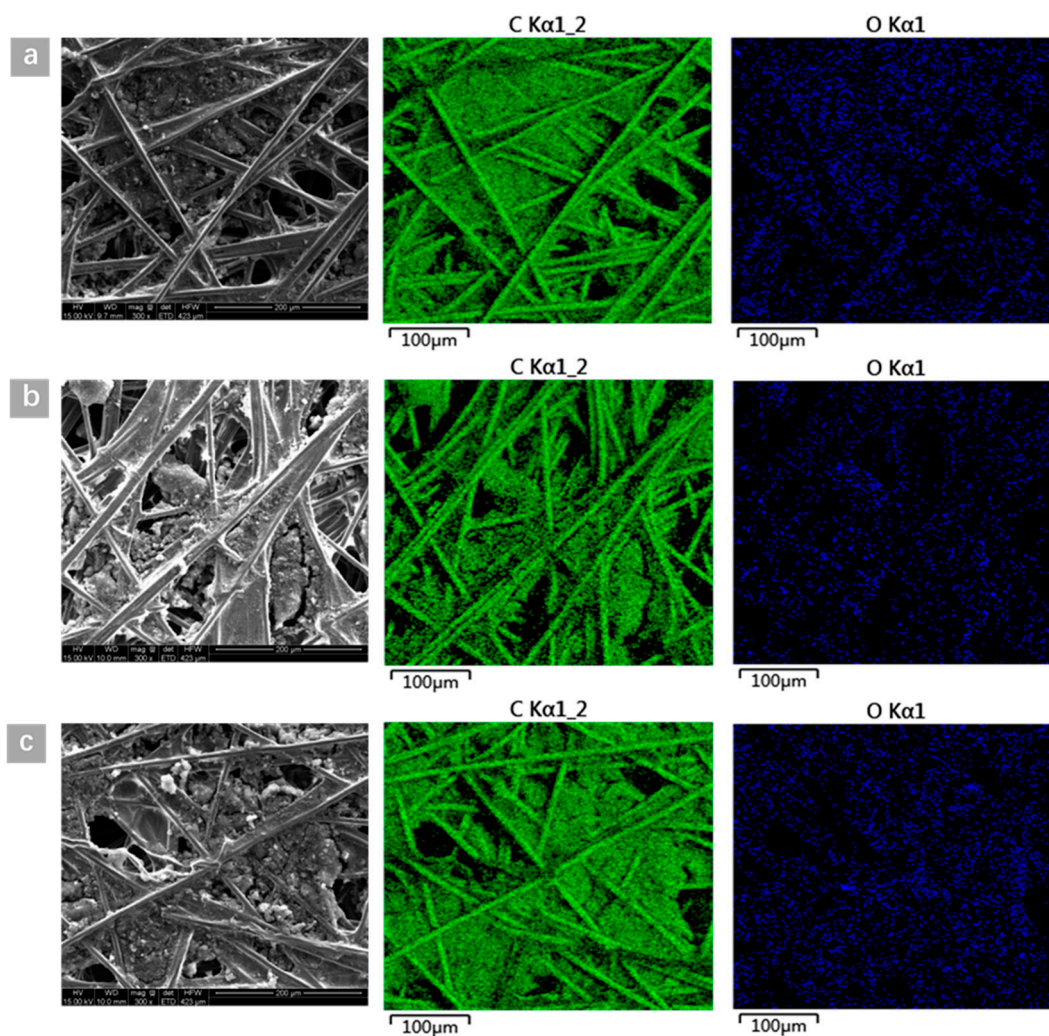

**Figure S8.** The SEM images and EDS mapping results of carbon and oxygen for the air cathode (a) without RM, (b) with bi-CoPc and (c) with bi-CoMnPc after 1 discharge-charge cycle.

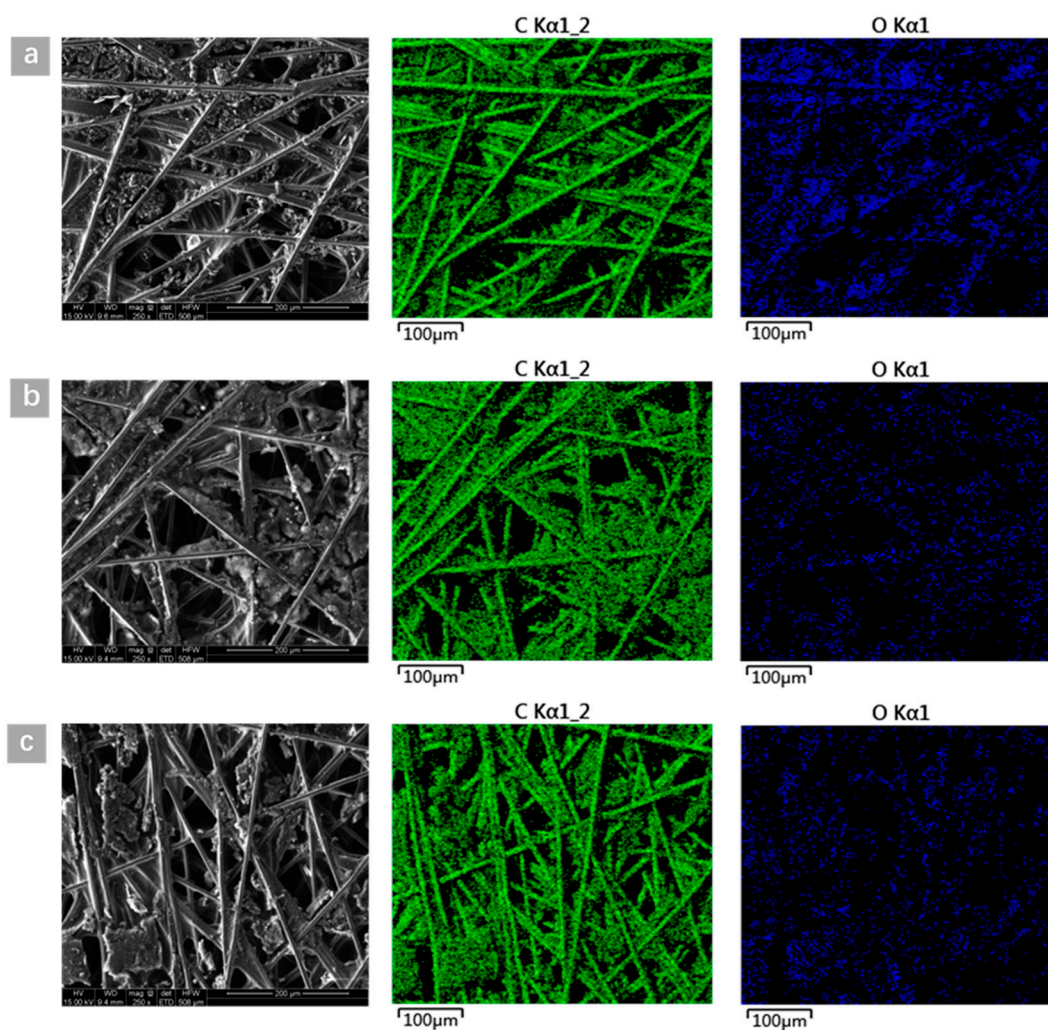

**Figure S9.** The SEM images and EDS mapping results of carbon and oxygen for the air cathode (a) without RM, (b) with bi-CoPc and (c) with bi-CoMnPc after 10 discharge-charge cycles.

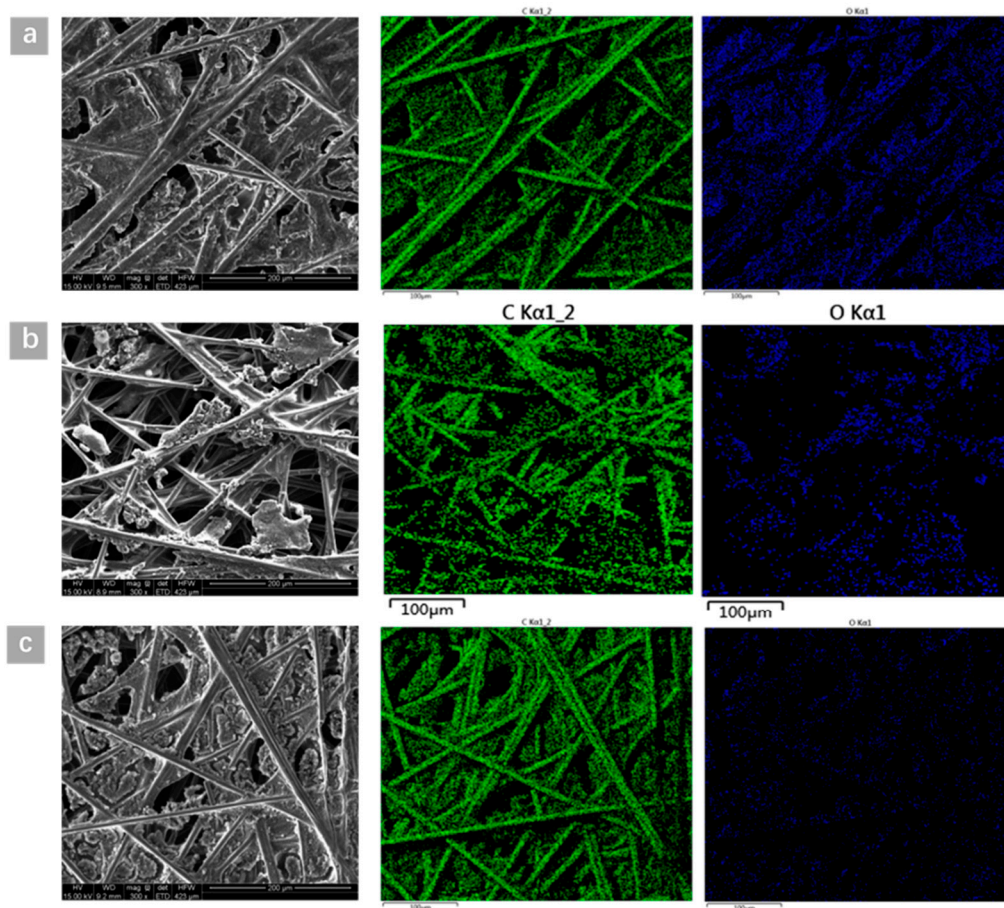

**Figure S10.** The SEM images and EDS mapping results of carbon and oxygen for the air cathode (a) without RM, (b) with bi-CoPc and (c) with bi-CoMnPc after 30 discharge-charge cycles.

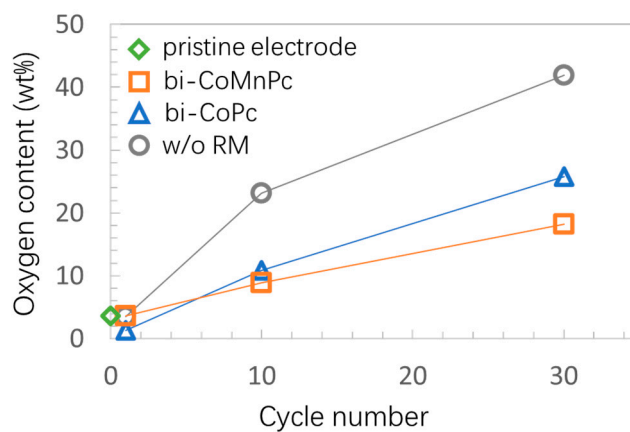

**Figure S11.** The oxygen content in the cycled air cathodes according to EDS results.
